# Supplementary material for: Morphological Characterization of 1322 Winter Wheat (Triticum aestivum L.) Varieties from EU Referent Collection
Source: MDPI journal article supplement (doi:10.3390/agriculture14040551), 2024-03-30
Supplement: s1 [file s1]

**Table S2.** Factor-variable correlations (factor loadings), based on correlations

|                                                    | Factor<br>1 | Factor<br>2 | Factor<br>3 | Factor<br>4 | Factor<br>5 | Factor<br>6 | Factor<br>7 | Factor<br>8 | Factor<br>9 | Fact.1<br>0 | Fact.1<br>1 | Fact.1<br>2 |
|----------------------------------------------------|-------------|-------------|-------------|-------------|-------------|-------------|-------------|-------------|-------------|-------------|-------------|-------------|
| Seed colour                                        | 0.044       | -0.126      | -0.717      | 0.155       | 0.313       | -0.358      | -0.323      | 0.289       | 0.125       | -0.059      | 0.107       | -0.023      |
| Plants with recurved flag leaves                   | 0.425       | 0.327       | -0.010      | -0.365      | 0.393       | 0.334       | 0.176       | 0.338       | 0.153       | 0.378       | 0.036       | -0.006      |
| Scurs and awns                                     | 0.731       | -0.542      | 0.103       | -0.104      | -0.031      | 0.104       | 0.028       | -0.085      | 0.175       | -0.207      | 0.056       | -0.234      |
| Glaucosity of neck of culm                         | -0.558      | -0.550      | -0.246      | -0.395      | 0.123       | 0.133       | -0.124      | 0.015       | -0.008      | 0.048       | -0.341      | -0.044      |
| Plant length                                       | 0.340       | 0.353       | -0.535      | -0.124      | 0.053       | 0.010       | -0.048      | -0.633      | 0.015       | 0.228       | -0.006      | -0.010      |
| Ear length                                         | -0.117      | 0.489       | -0.520      | -0.186      | -0.079      | 0.227       | 0.361       | 0.102       | -0.120      | -0.478      | -0.008      | -0.016      |
| Scurs and awns length                              | 0.748       | -0.527      | -0.088      | -0.109      | -0.019      | 0.064       | 0.038       | -0.035      | 0.201       | -0.192      | -0.056      | 0.236       |
| Ear colour                                         | -0.021      | -0.379      | 0.051       | 0.390       | 0.695       | -0.018      | 0.348       | -0.150      | -0.269      | -0.039      | -0.012      | 0.004       |
| Time of emergence                                  | -0.611      | -0.182      | -0.143      | 0.235       | -0.111      | -0.056      | 0.408       | -0.069      | 0.564       | 0.108       | 0.029       | -0.007      |
| Glaucosity of flag leaves                          | -0.600      | -0.500      | -0.031      | -0.437      | 0.056       | 0.229       | -0.082      | -0.127      | -0.096      | -0.015      | 0.331       | 0.043       |
| Area of convex surface of apical rachis<br>segment | -0.026      | 0.194       | 0.285       | -0.616      | 0.199       | -0.639      | 0.176       | -0.070      | 0.065       | -0.111      | -0.005      | 0.001       |
| Shape of beak of lower glume                       | 0.270       | -0.471      | -0.325      | -0.072      | -0.433      | -0.247      | 0.340       | 0.161       | -0.330      | 0.309       | 0.026       | -0.012      |
