# Supplementary material for: Morphological Characterization of 1322 Winter Wheat (Triticum aestivum L.) Varieties from EU Referent Collection
Source: MDPI journal article supplement (doi:10.3390/agriculture14040551), 2024-03-30
Supplement: s1 [file s1]

**Table S1.** Mean, minimum and maximum values and standard deviations for 27 continuously variable descriptors for 1322 winter wheat varieties

|                                                               | Descriptive Statistics |       |         |         |          |
|---------------------------------------------------------------|------------------------|-------|---------|---------|----------|
|                                                               | Valid<br>N             | Mean  | Minimum | Maximum | Std.Dev. |
| Seed: colour                                                  | 1322                   | 1.492 | 1       | 4       | 0.628    |
| Seed: coloration with phenol                                  | 1322                   | 7.344 | 1       | 9       | 1.803    |
| Coleoptile: anthocyanin coloration                            | 1322                   | 1.141 | 1       | 9       | 0.663    |
| Plant: growth habit                                           | 1322                   | 4.638 | 1       | 9       | 1.111    |
| Plants: frequency of plants with recurved flag leaves         | 1322                   | 3.626 | 1       | 9       | 1.654    |
| Flag leaf: anthocyanin coloration of auricles                 | 1322                   | 1.035 | 1       | 7       | 0.270    |
| Time of ear emergence (first spikelet visible on 50% of ears) | 1322                   | 6.641 | 1       | 9       | 1.854    |
| Flag leaf: glaucosity of sheath                               | 1322                   | 7.210 | 1       | 9       | 1.429    |
| Fleg leaf: glaucosity of blade                                | 1322                   | 6.524 | 1       | 9       | 1.649    |
| Ear: glaucosity                                               | 1322                   | 5.750 | 1       | 9       | 1.574    |
| Culm: glaucosity of neck                                      | 1322                   | 6.731 | 1       | 9       | 1.550    |
| Lower glume: hairiness of external surface                    | 1322                   | 1.049 | 1       | 9       | 0.621    |
| Plant: length (stem,ears,awns and scurs)                      | 1322                   | 4.110 | 1       | 9       | 1.433    |
| Straw: pith in cross section                                  | 1322                   | 1.493 | 1       | 3       | 0.555    |
| Ear: density                                                  | 1322                   | 4.325 | 2       | 9       | 1.012    |
| Ear: length (excluding awns and scurs)                        | 1322                   | 3.797 | 1       | 9       | 1.401    |
| Ear: scurs and awns                                           | 1322                   | 2.310 | 1       | 3       | 0.543    |
| Ear: length of scurs or awns                                  | 1322                   | 4.209 | 1       | 9       | 2.104    |
| Ear: colour                                                   | 1322                   | 1.152 | 1       | 2       | 0.359    |
| Ear: shape in profile                                         | 1322                   | 2.427 | 1       | 5       | 1.705    |

|                                                           |      |       |   |   |       |
|-----------------------------------------------------------|------|-------|---|---|-------|
| Apical rachis segment: area of hairness of convex surface | 1322 | 4.623 | 1 | 9 | 2.145 |
| Lower glume: shoulder width                               | 1322 | 4.297 | 1 | 9 | 1.828 |
| Lower glume: shoulder shape                               | 1322 | 4.486 | 1 | 9 | 1.737 |
| Lower glume: length of beak                               | 1322 | 6.032 | 1 | 9 | 1.955 |
| Lower glume: shape of beak                                | 1322 | 3.803 | 1 | 9 | 1.645 |
| Lower glume: area of hairiness on internal surface        | 1322 | 2.830 | 1 | 9 | 1.465 |
| Seasonal type                                             | 1322 | 1.011 | 1 | 2 | 0.106 |

---
